# Supplementary material
Source: publisher site journal article supplement (https://www.dovepress.com/get_supplementary_file.php?f=489520.docx)
Supplement: Supplementary file 1 [file get_supplementary_file.php]

**Additional file 1. Consolidated criteria for reporting qualitative studies (COREQ): 32-item checklist**

**Domain 1: Research team and reflexivity**

***Personal Characteristics***

1. Interviewer/facilitator: Which author/s conducted the interview or focus group?

LD, CC, and JP conducted the interviews.

2. Credentials: What were the researcher’s credentials? E.g. PhD, MD

LD (MM), CC (PhD), JW (MM), JP (PhD).

3. Occupation: What was their occupation at the time of the study?

The interviewers’ occupations were: LD (Postgraduate Student), CC (Lecturer), JW (Doctoral candidate), JP (Professor).

4. Gender: Was the researcher male or female?

LD, CC and JW are female, JP is male.

5. Experience and training: What experience or training did the researcher have?

LD and JW had 2 years, CC and JP had over 6 years and experience conducting research projects particularly focused on health disparities in poverty population, including qualitative and focus group interviewing.

***Relationship with participants***

6. Relationship established: Was a relationship established prior to study commencement?

Participants met interviewers on the day of the interview.

7. Participant knowledge of the interviewer: What did the participants know about the researcher? e.g. personal goals, reasons for doing the research

All participants received and signed informed consent form that indicated the purpose of the study.

8. Interviewer characteristics: What characteristics were reported about the interviewer/facilitator? e.g. Bias, assumptions, reasons and interests in the research topic.

All interviewers conducted fair and objective interviews with all research subjects, and we do not think there was any bias cause by interviewers during this process.

**Domain 2: study design**

***Theoretical framework***

9. Methodological orientation and Theory: What methodological orientation was stated to underpin the study? e.g. grounded theory, discourse analysis, ethnography, phenomenology, content analysis

The methodological orientation used was the thematic analysis.

***Participant selection***

10. Sampling: How were participants selected? e.g. purposive, convenience, consecutive, snowball

The participants were recruited by purposive sampling. We have contacted patients’ attending respiratory physicians to identify and refer potentially eligible subjects to the research team, then research team approached the patient to see if they were willing to participate in the study.

Additional eligibility criteria include: 1) aged 18 and older; 2) the primary admission diagnosis meets OECD standards of PPH.

Exclusion criteria include: 1) cases with pregnancy; 2) cases that are same day/day only admission; 3) refuse to participate in the study; 4) participants cannot adequately express their experiences.

11. Method of approach: How were participants approached? e.g. face-to-face, telephone, mail, email

Face to face.

12. Sample size: How many participants were in the study?

22.

13. Non-participation: How many people refused to participate or dropped out? Reasons?

No one dropped out as this was a cross-sectional study. 22 of individuals identified as potentially eligible. Among those eligible, 1 refused participation, stating he was not interested in the topic. An additional 1 individual was deemed ineligible because she failed to adequately express the experiences.

***Setting***

14. Setting of data collection: Where was the data collected? e.g. home, clinic, workplace

All data was collected at the hospital ward.

15. Presence of non-participants: Was anyone else present besides the participants and researchers?

In some cases, family members or another patient were in the ward.

16. Description of sample: What are the important characteristics of the sample? e.g. demographic data, date

This is described in Table 1 of the manuscript.

***Data collection***

17. Interview guide: Were questions, prompts, guides provided by the authors? Was it pilot tested?

The research team had developed an interview guide. Before implementation, we had a pilot test, and were also made some modification and supplement to the interview guide.

18. Repeat interviews: Were repeat interviews carried out? If yes, how many?

All patients were only interviewed once.

19. Audio/visual recording: Did the research use audio or visual recording to collect the data?

Interviews were recorded using a voice recorder.

20. Field notes: Were field notes made during and/or after the interview or focus group?

Field notes were taken during the interview and we considered these notes in analyses.

21. Duration: What was the duration of the interviews or focus group?

Interviews took 20-40 minutes.

22. Data saturation: Was data saturation discussed?

Data saturation was discussed. When we considered the thematic saturation was reached, the interviews ceased.

23. Transcripts returned: Were transcripts returned to participants for comment and/

or correction?

Transcripts were not returned to participants for comment and/or correction. Our study did not include patient follow-up.

**Domain 3: analysis and findings**

***Data analysis***

24. Number of data coders: How many data coders coded the data?

Two independent coders (LD and CC) coded the data.

25. Description of the coding tree: Did authors provide a description of the coding tree?

We provide descriptions of our coding process in the manuscript.

26. Derivation of themes: Were themes identified in advance or derived from the data?

Themes identified derived from the data.

27. Software: What software, if applicable, was used to manage the data?

Excel and Word were used to manage the thematic data.

28. Participant checking: Did participants provide feedback on the findings?

Participants did not provide feedback on the findings. Our study did not include patient follow-up.

***Reporting***

29. Quotations presented: Were participant quotations presented to illustrate the themes/findings? Was each quotation identified? e.g. participant number

Yes.

30. Data and findings consistent: Was there consistency between the data presented and the findings?

Yes.

31. Clarity of major themes: Were major themes clearly presented in the findings?

Yes.

32. Clarity of minor themes: Is there a description of diverse cases or discussion of minor themes?

Yes.

**Additional file 2**. **Interview Guide**

**I. Basic Information of the Patient**

1.How old are you?

2.What is your education level?

3.What is your occupation?

**II. Medical Information of the Patient**

1.How long have you been ill?

2.What is the reason for your hospitalization?

3.Would you choose to visit a community health service center/township clinic for treatment?

4.Where do you usually purchase your medications?

**III. Patient Behavior and Habits**

1.Do you smoke?

2.Does your family cook using firewood/coal or electricity?

3.Do you usually pay attention to managing your disease? What methods do you use for management?

4.Have you received the flu vaccine/pneumonia vaccine?

5.Do you adhere to a regular medication schedule every day?

6.Are you aware of COPD-related knowledge and have you received relevant health education? If so, through what means?

**IV. Financial Burden on the Patient**

1.How much do you spend on medications each month? Are the medications reimbursed?

2.How much did your hospitalization cost?

3.Have you registered for outpatient chronic disease policy?

**V. Health Education Provided by Medical Service Providers**

1.Did the community health service center/township clinic/hospital inform you about disease management?

2.Did the community health service center/township clinic/hospital inform you about how to perform breathing exercises?

3.Does the community health service center/township clinic conduct follow-up work?
